# Supplementary material
Source: PubMed Central journal article supplement (PMC1887573)

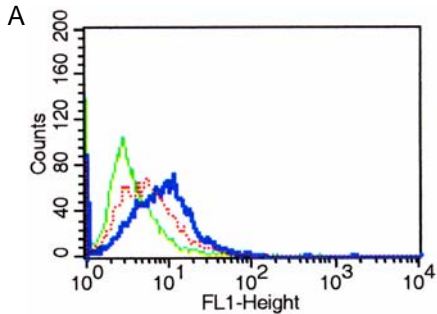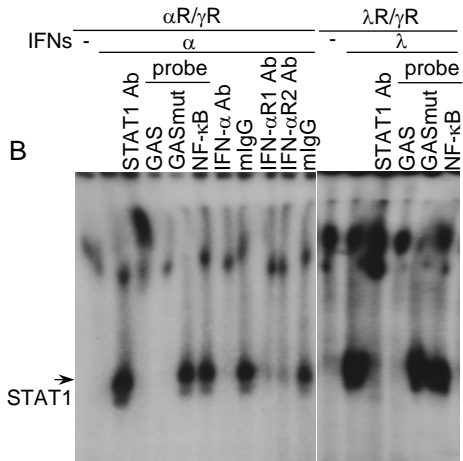

Supplement: pnas_0610352104_2.pdf [file pnas_0610352104_2.pdf]

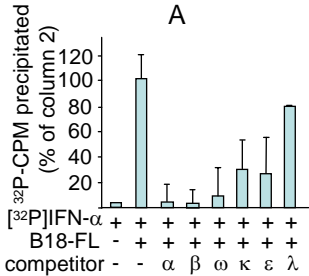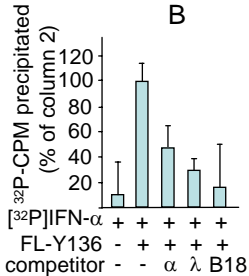

Supplement: pnas_0610352104_3.pdf [file pnas_0610352104_3.pdf]
